# Supplementary material for: Consumption Rate of Lichens by Constrictotermes cyphergaster (Isoptera): Effects of C, N, and P Contents and Ratios
Source: MDPI journal article supplement (doi:10.3390/insects10010023), 2019-01-09
Supplement: s1 [file s1]

**Table S1.** C, N and P contents (g/kg) found in *Poincianella pyramidalis*, *Mimosa* spp., and *Croton* spp., organisms of the diet of *Constrictotermes cyphergaster* in a semi-arid area in northeast Brazil. Five individuals of each species were analyzed.

| Species                         | Average $\pm$ SE   |                  |                  |
|---------------------------------|--------------------|------------------|------------------|
|                                 | C                  | N                | C:N              |
| <i>Poincianella pyramidalis</i> | 214.72 $\pm$ 14.28 | 13.24 $\pm$ 0.34 | 29.17 $\pm$ 1.72 |
| <i>Mimosa</i> spp.              | 218.31 $\pm$ 8.40  | 12.53 $\pm$ 0.40 | 17.95 $\pm$ 0.97 |
| <i>Croton</i> spp.              | 218.15 $\pm$ 9.00  | 9.55 $\pm$ 0.54  | 17.03 $\pm$ 0.87 |
